# Supplementary material for: Tough asymmetric thermochromic ionogels via dynamic in situ phase separation for passive/active smart optical switching
Source: Research Square preprint supplement (doi:10.21203/rs.3.rs-7405105/v1), 2025-09-10
Supplement: Supplementary file 1 [file 834bb3a751d93524afff1f4d.pdf]

## **Supplementary Information**

### **Tough asymmetric thermochromic ionogels via dynamic in situ phase separation for passive/active smart optical switching**

Guoli Du,<sup>1</sup> Jianing Li,<sup>1</sup> Changxing Wang,<sup>1</sup> Jianing Li,<sup>1</sup> Yayun Ning,<sup>1</sup> Yifan Yue,<sup>1</sup>  
Yuechi Xie,<sup>1</sup> Sen Yang,<sup>1\*</sup> Xuegang Lu<sup>1\*</sup>

<sup>1</sup>School of Physics, MOE Key Laboratory for Nonequilibrium Synthesis and  
Modulation of Condensed Matter, Xi'an Jiaotong University, Xi'an 710049, China

\*Corresponding author: xglu@mail.xjtu.edu.cn; yangsen@mail.xjtu.edu.cn

#### **This file includes**

Supplementary Methods

Supplementary Figures 1-34

Supplementary Tables 1-3

Supplementary Notes 1-4

Supplementary References 1-12

## 1    **Supplementary Methods**

### 2    **Materials**

3    The monomers n-butyl acrylate (BA) and N-isopropylacrylamide (NIPAM), Irgacure  
4    1173, cross-linker ethylene glycol dimethacrylate (EGDMA) and N,N'-  
5    methylenebis(acrylamide) (MBAA), thermal initiator ammonium persulfate (APS), and  
6    accelerator N,N,N',N'-tetramethylethylenediamine (TEMED) were purchased from  
7    Aladdin. The ionic liquid [Emim][TFSI] was purchased from Lanzhou Institute of  
8    Chemical Physics. The reagents used in the experiments were used as received without  
9    further purification, and the DI water used was purified by Master-Q30. Flexible  
10    graphene heating sheet with polyethylene terephthalate (PET) substrate and copper tape  
11    purchased from Shenzhen Nuanfeng Technology Co. The following materials were  
12    purchased from Alibaba: transparent sheets including glass, polymethyl methacrylate  
13    (PMMA), polyvinyl chloride (PVC), polycarbonate (PC); commercial tape including  
14    polyimide (PI), 3M VHB tape, 3M 9080 tape; and insulated foam boxes.

### 15    **Preparation of pure PBA ionogels, bilayer ionogels and PNIPAM hydrogels**

16    Pure PBA ionogels were prepared in a similar manner as ATI-B in asymmetric ionogels,  
17    except that there was no subsequent in situ light curing. Physical bilayer ionogels were  
18    prepared by preparing ionogels with ATI-B and ATI-BN as precursors, respectively,  
19    and using an external force to adhere them together and overnight.

20    9.2 mmol of NIPAM was dissolved in 13 mL of DI water. Sequentially, 0.26 mmol of  
21    MBAA, 0.09 mmol of APS and 0.27 mmol of TEMED were added to the solution. The

solution was stirred at 0°C for 2 h and then placed in a refrigerator at 2-4°C overnight.

The resulting gel was immersed in DI water for 48 h to obtain PNIPAM hydrogel.

## **Computational methods**

Molecular dynamics (MD) simulations were performed within Materials Studio using the Forcite module. The initial computational model comprised a simulation box measuring 3.29 nm<sup>3</sup>, containing 10 PBA chains (each with a polymerization degree of 10) and 22 [EMIM][TFSI] ionic liquid molecules. An initial amorphous structure was generated by subjecting this model to geometry relaxation using the COMPASS II force field. Subsequently, MD simulations employing the COMPASS II force field were carried out. The system underwent NPT ensemble equilibration for 100 ps using a Nosé thermostat and barostat to achieve system equilibration. For the analysis of structural and diffusional properties, NVT ensemble simulations were conducted for 1000 ps at temperatures of either 298K or 313K, employing a time step of 1.0 fs. Interaction energies were performed using the Dmol<sup>3</sup> code in Materials Studio software. Van der Waals correction of Grimme's DFT-D3 model<sup>1</sup> was used, together with the GGA/PBE<sup>2,3</sup> exchange-correlation functional and a DNP basis set. Next, an energy convergence criterion of 1×10<sup>-5</sup> Ha and a force convergence criterion of 0.002 Ha Å<sup>-1</sup> were set in the calculation. The interaction energy ( $E$ ) was calculated by the following equation:

$$E = E_{A+B} - (E_A + E_B) \quad (1)$$

where  $E_A$ ,  $E_B$ , and  $E_{A+B}$  are the energy of the isolate A, B, and A-B complex, respectively.

#### **Mechanical performance test**

Tensile and compression tests were performed using an electronic universal testing machine (3367, Instron, USA). The tensile samples were dumbbell-shaped with a tensile area size of  $20 \times 35 \times 2$  mm and a tensile speed of  $50 \text{ mm min}^{-1}$ . Sandpaper and tape were used to secure the ionogel to the fixture during testing. The compression specimen was cylindrical with a diameter of 10 mm and a height of 5 mm, and the compression speed was  $50 \text{ mm min}^{-1}$ ; the maximum strain value for the compression cycle test was set at 70%. For the lap-shear experiments, two Al sheet were used as substrate and glue was used to bond the ionogels to them. The contact area between the ionic gel and the aluminum sheet was  $25 \times 25$  mm, and the test speed was  $20 \text{ mm min}^{-1}$ . To demonstrate the excellent interfacial strength of the ATIs, two commercial double-sided adhesives (VHB and 9080) were purchased from 3M for comparison. For adhesion testing, ATIs were cut into  $20 \times 100 \times 2$  mm blocks. They were adhered to different substrates and to avoid air bubbles at the interface, pressed using a heavy weight and left overnight. PI tapes were used as a backing to avoid stretching of the ATIs during the tests. To test impact resistance, equal sized ATIs were sandwiched between two white PVC sheets, along with tempered glass, and a 1.25t vehicle was driven over them to assess their morphological integrity.

#### **Surface hydrophobicity test**

Surface hydrophobicity tests were performed on glass, PNIPAM hydrogel, and ATI using an optical contact angle meter (DSA100S, Kruss, Germany). The glass was ultrasonically cleaned and dried using DI water and alcohol prior to testing. Dust-free

paper was used to vacuum the water from the surface of the PNIPAM hydrogel. No additional treatment was performed on the ATI except for the use of alcohol to clean the surface of floating dust. ATIs were tested for surface droplet adhesion and antifouling ability using a mixture of toluidine blue and toner configured respectively. According to the Hamaker theory and the Young-Dupré equation<sup>4, 5</sup>, the work of adhesion is given by the following equation:

$$W_{LS} = \gamma_L (1 + \cos\theta) \quad (2)$$

where  $W_{LS}$  is the work of adhesion at the interface of the two phases,  $L$  and  $S$  represent liquids and solids, respectively; the surface tension ( $\gamma$ ) of water at room temperature is 72 mN m<sup>-1</sup>; and  $\theta$  is the contact angle.

#### **Smart cooling window test**

Transmittance variations of ATIs in the 200-2500 nm wavelength range over 20-45°C were measured using a near-infrared spectrometer (NIRQUEST+2.5, Ocean Optics, USA) and a temperature-controlled accessory. To evaluate the cooling performance of the material, commercial foam boxes (inside diameter: 22.8×12×14.7 cm, wall thickness: 3 cm) with a top opening size of 12×12 cm were used as a model house with one window. Tempered glass, ATI (attached to glass, ATI-B side close to the glass), and air (open system) were used as the windows of the model house, respectively. A xenon lamp was used to simulate sunlight to evaluate the cooling ability of the material and a thermocouple (TA612C, TASI, China) was used for temperature monitoring. When the field test of smart cooling windows was conducted, a model house with different materials as windows was placed outdoors (Xi'an, China, May 20, 2025) and

the temperature inside was monitored for 24 h. To prepare the aesthetic smart windows, the shape of the ATI was customized using the template cutting method and stained using dyes.

### **Smart projection screen test**

For localized opacity display of ATIs, a patterned customized flexible graphene heating sheet was used as a Joule heating substrate, which was powered using a DC power supply (24 V). To realize an in situ global opaque display of the ATI, the ATI body can be used as a flexible Joule heater. A signal generator (FY6900, Feiyi, China) and a high voltage amplifier (ATA-2041, Aigtek, China) were used to power the ATI. The local maximum temperature of the ATI can reach 50°C when the operating frequency and voltage were 10 kHz and 180 V, respectively. Electrochemical impedance spectra (EIS) of ATIs were obtained by an electrochemical workstation (PARSTAT MS, Princeton, USA), thermoregulated using a temperature control accessory, and temperature monitored using a thermocouple. The ionic conductivity of ATI was calculated by the following equation:

$$\sigma = \frac{L}{R_b \times S} \quad (3)$$

where  $\sigma$  is the ionic conductivity;  $L$  is the thickness of the specimen sandwiched between the electrodes;  $R_b$  is the intrinsic resistance of the specimen; and  $S$  is the contact area between the specimen and the electrode.

An infrared thermal imager (TiS55+, Fluke, USA) was used to visualize the local heat distribution on the ATIs. When used as smart projection screens, ATIs are transformed

109    opaque by indirect localized heating or direct Joule heating, and projections are made

110    on their surfaces using a commercial micro-projector.

111

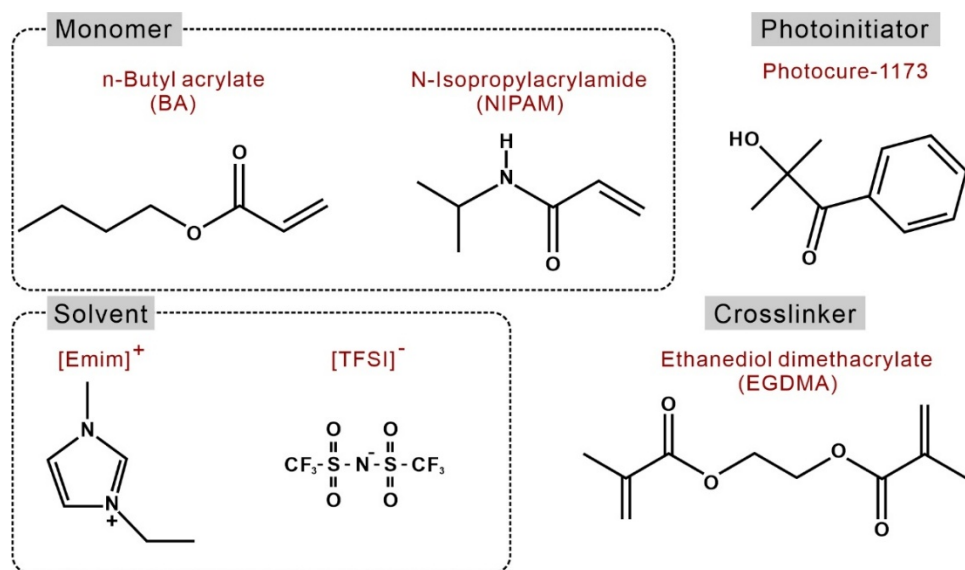

**Supplementary Figure 1. Molecular structures of chemicals used in the synthesis of ATI precursors.**



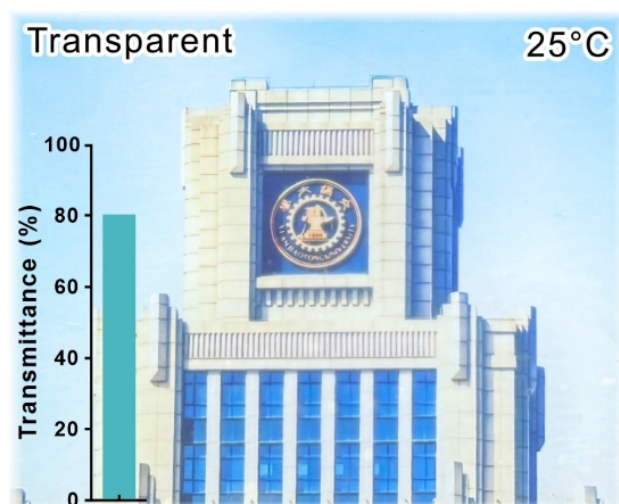

116

117 **Supplementary Figure 2. Optical photograph of ATI at 25°C (Hanying building**  
118 **of XJTU in the background, used with permission), inset shows the transmittance**  
119 **of light at 550 nm wavelength.**

120

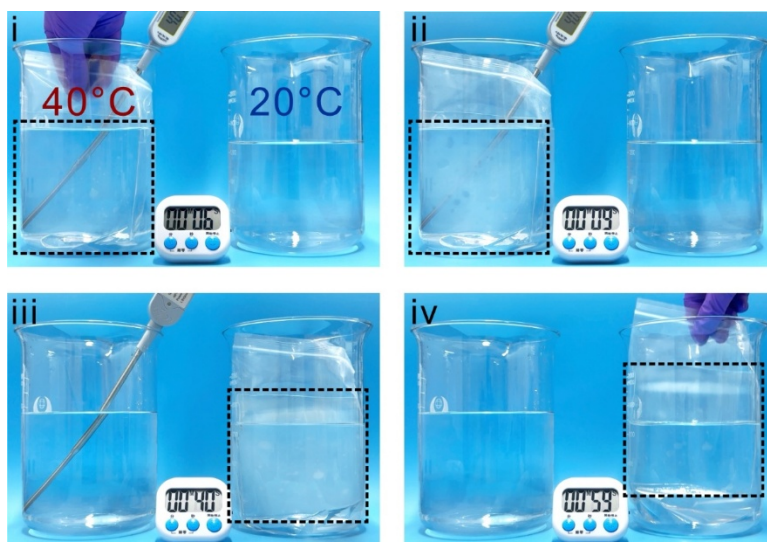

121

122 **Supplementary Figure 3. The thermochromic process of ATI.** Including i)  
123 immersion in hot water at 40°C; ii) an opaque transformation; iii) transfer to cool water  
124 at 20°C; and iv) return to a transparent state.

125

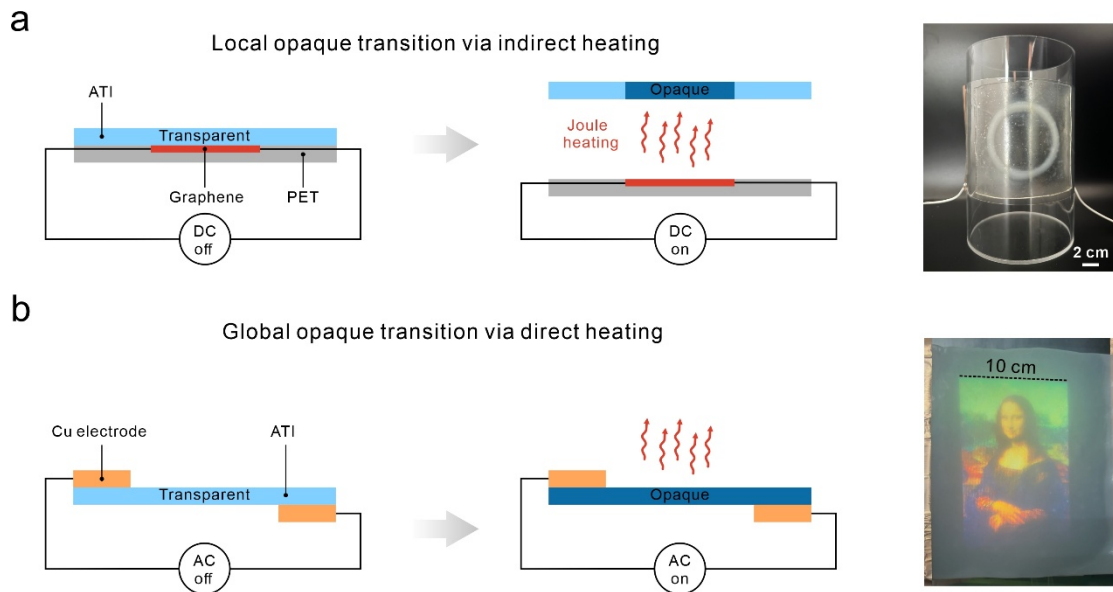

**Supplementary Figure 4. Local/global opaque transitions achieved by indirect/direct Joule heating of ATI.** a) Schematic of the process of indirect Joule heating of ATI using flexible graphene heating sheets (left) and local display effect (right). b) Schematic of the process of direct Joule heating of ATI using alternating current (left) and display effect of global projection screen (right).

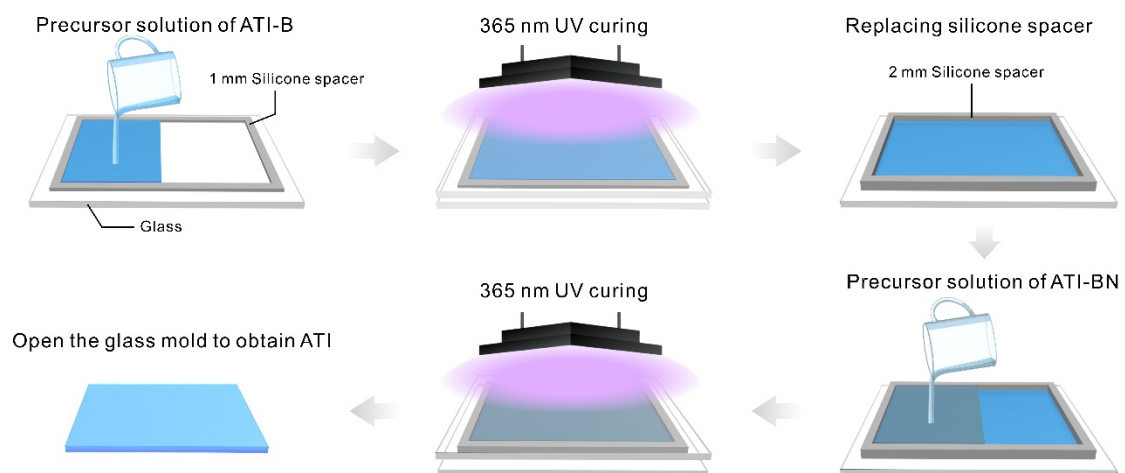

**Supplementary Figure 5. Schematic of the ATI preparation process.**

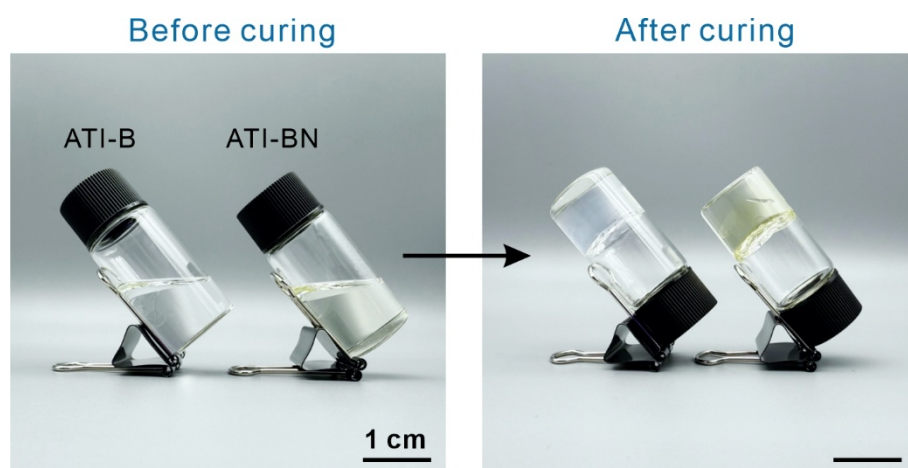

**Supplementary Figure 6. Photographs of precursor solutions of ATI-B and ATI-BN before and after curing, respectively.**

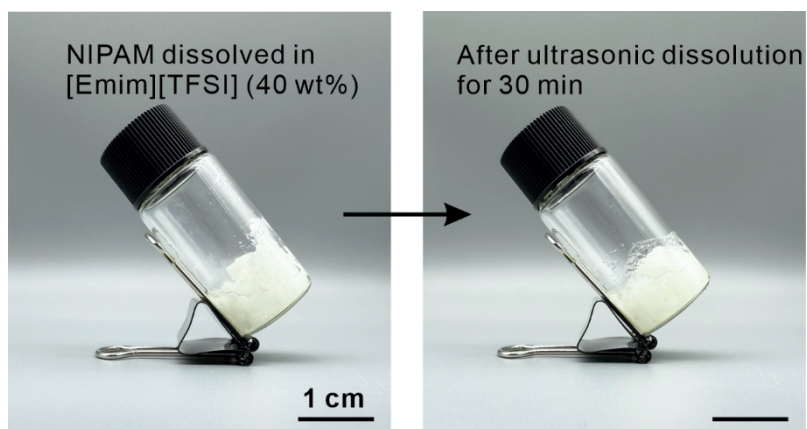

**Supplementary Figure 7. Demonstration of NIPAM solubility in [Emim][TFSI].**

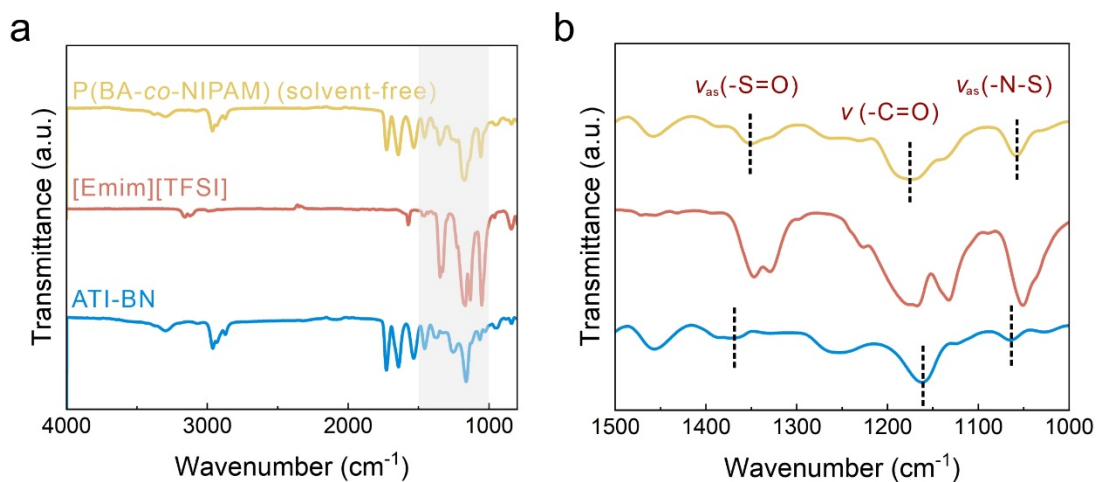

**Supplementary Figure 8. FTIR spectra of solvent-free P (BA-co-NIPAM), solvent [Emim] [TFSI], and ionogel ATI-BN.** a) Wavenumbers in the range of 800-4000  $\text{cm}^{-1}$ . b) Wavenumbers in the range of 1000-1500  $\text{cm}^{-1}$ . The same color refers to the same component.

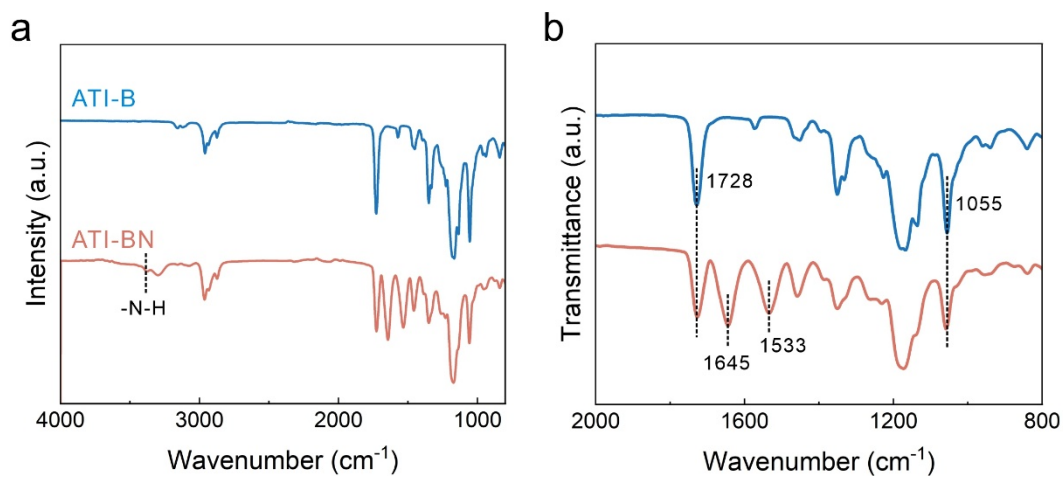

**Supplementary Figure 9. FTIR spectra of ATI-B and ATI-BN.** a) Wavenumbers in the range of 800-4000  $\text{cm}^{-1}$ . b) Wavenumbers in the range of 800-2000  $\text{cm}^{-1}$ . The same color refers to the same component.



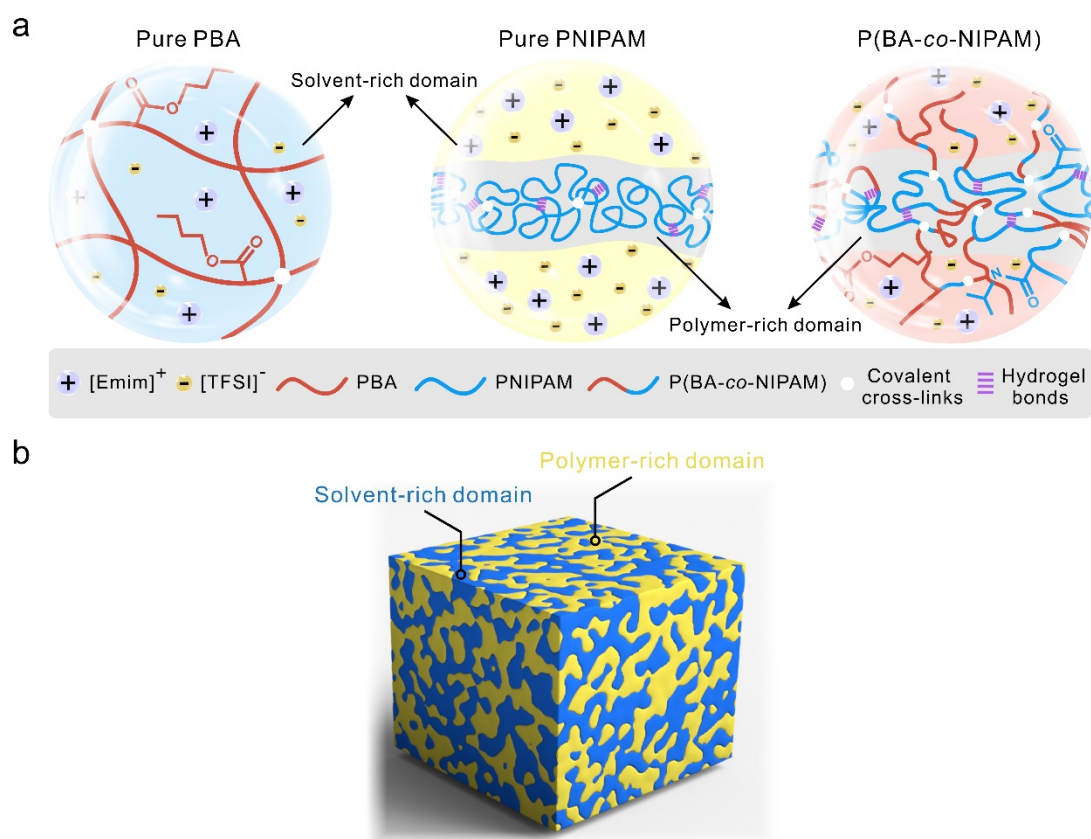

154

155 **Supplementary Figure 10. Schematic of phase separation in ATI-BN.** a)

156 Homopolymer networks of PBA and PNIPAM; and copolymer networks of P(BA-co-

157 NIPAM) in phase-separated structures. b) Bicontinuous networks in in situ phase-

158 separated structures.

159

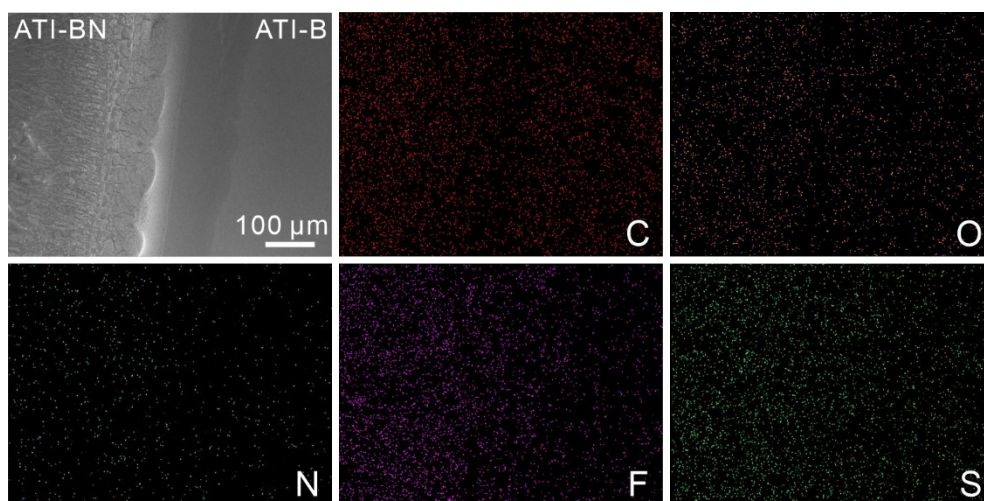

**Supplementary Figure 11. Cross-section SEM image and EDS mapping of ATI.**

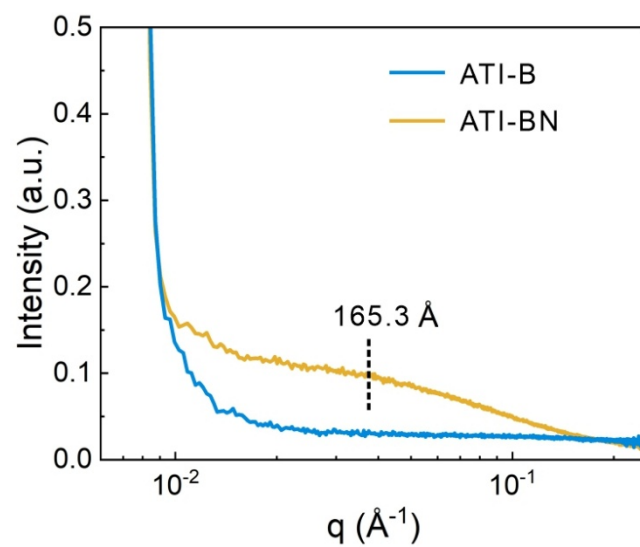

**Supplementary Figure 12. 1D SAXS spectra of ATI-BN.**

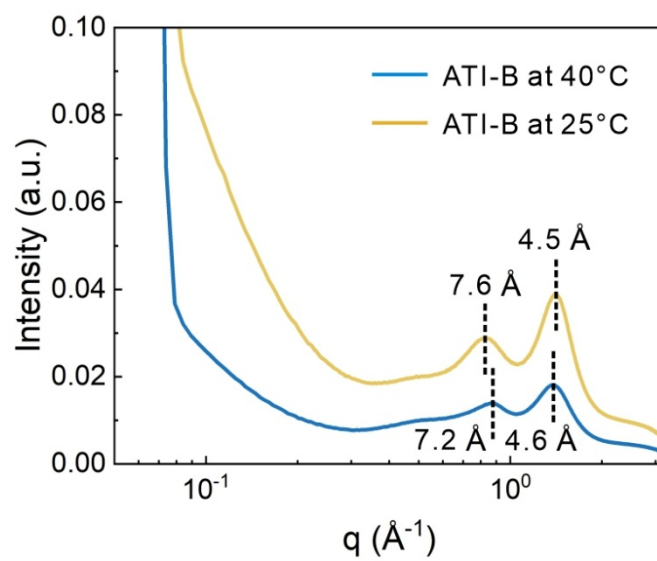

**Supplementary Figure 13. 1D WAXS spectra of ATI-B.**

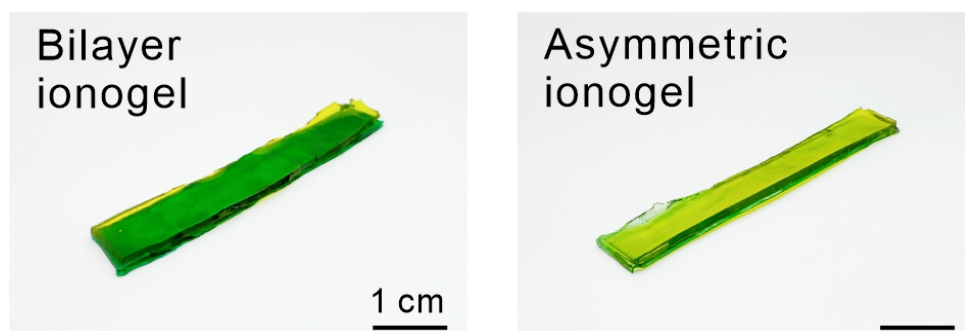

169

170 **Supplementary Figure 14. Optical photographs of bilayer ionogel and asymmetric**  
171 **ionogel after staining treatment.**

172

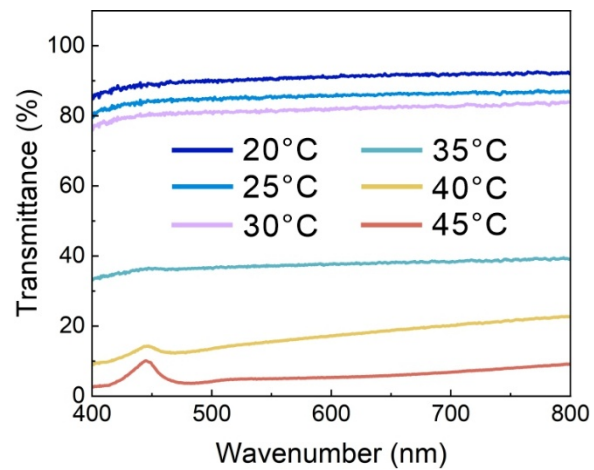

173

174 **Supplementary Figure 15. The transmittance of ATI within the visible light**  
 175 **range at temperatures between 20-45°C.**

176

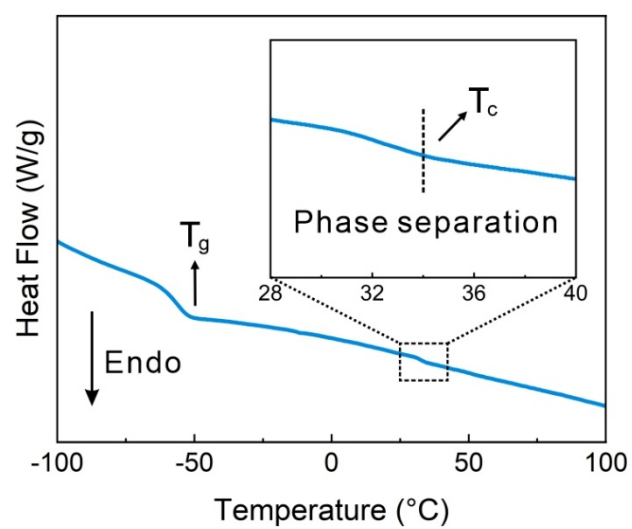

177

178 **Supplementary Figure 16. DSC curve of ATI-B in the temperature range of -100**

179 **to 100°C.**

180

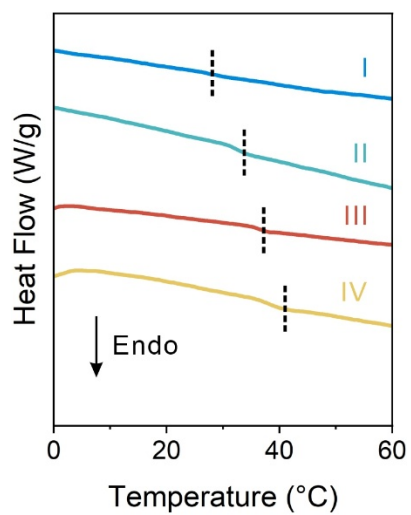

181

182 **Supplementary Figure 17. DSC curves of ATI-B in different polymer/IL ratios.**

183



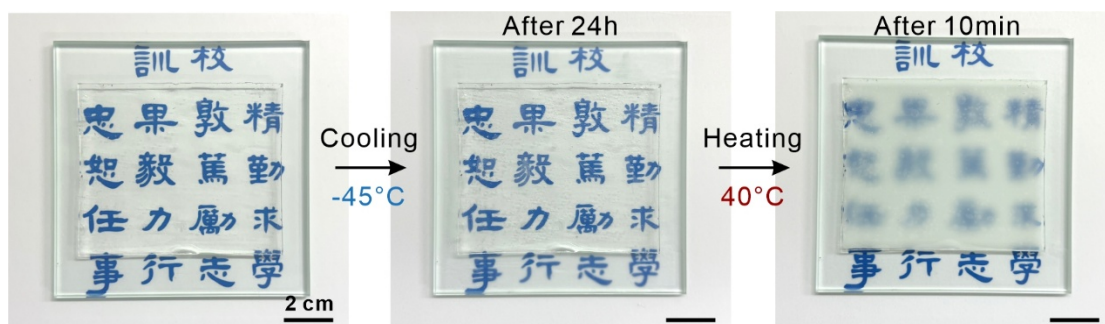

**Supplementary Figure 18. Transparency changes of ATI-BN during freezing-heating process (the motto of XJTU in the background, used with permission).**

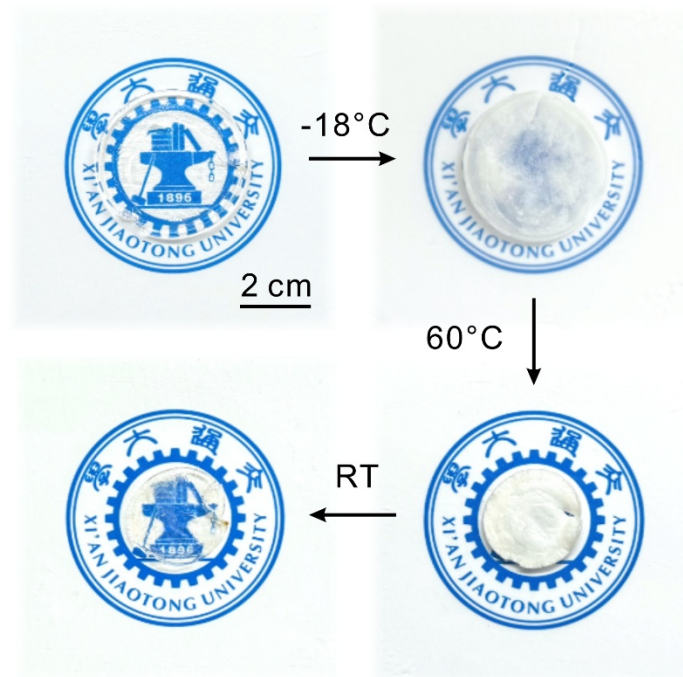

188

189 **Supplementary Figure 19. Morphological changes in PNIPAM hydrogels during**  
 190 **freezing-heating process (the XJTU school emblem in the background, used with**  
 191 **permission).**

192

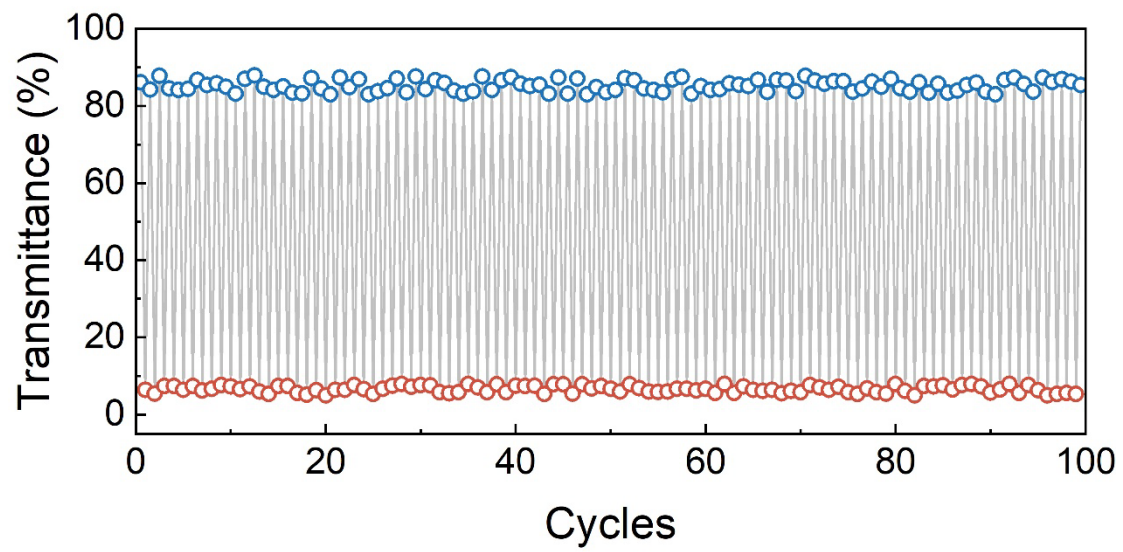

193

194 **Supplementary Figure 20. Changes in transmittance (at 550 nm wavelength) of**  
195 **ATI over 100 cycles of freezing and heating from  $-45^{\circ}\text{C}$  to  $40^{\circ}\text{C}$ .**

196

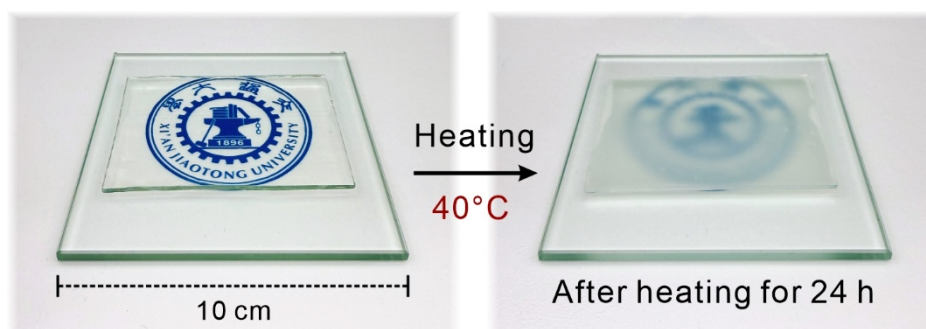

**Supplementary Figure 21. Optical photographs of ATI before and after 24h continuous heating (the XJTU school emblem in the background, used with permission).**

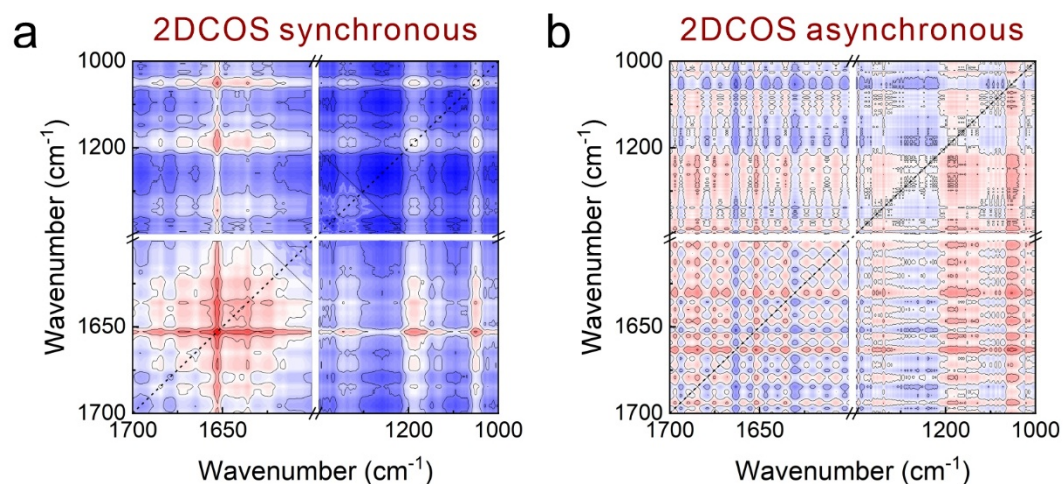

**Supplementary Figure 22. 2D correlation spectra of temperature-dependent FTIR of ATI.** a) 2DCOS synchronous spectra and b) 2DCOS asynchronous spectra. In 2DCOS spectra, the warm colors (red) represent positive intensities, while cold colors (blue) represent negative ones.

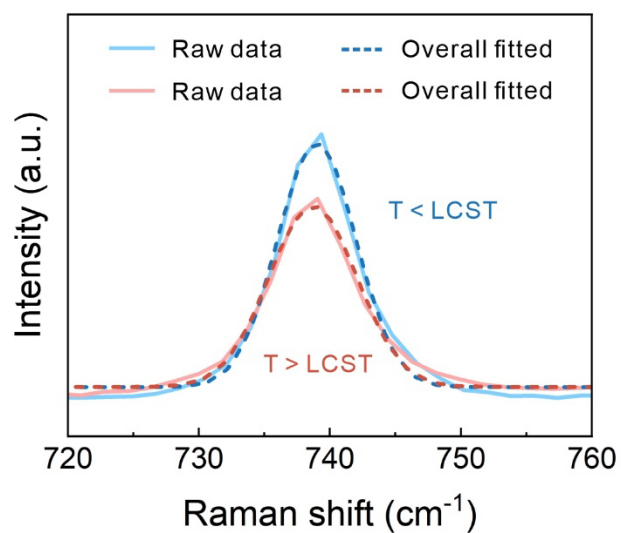

208

209 **Supplementary Figure 23. Temperature-dependent Raman spectra above and**  
 210 **below LCST, including fitted and raw data.**

211

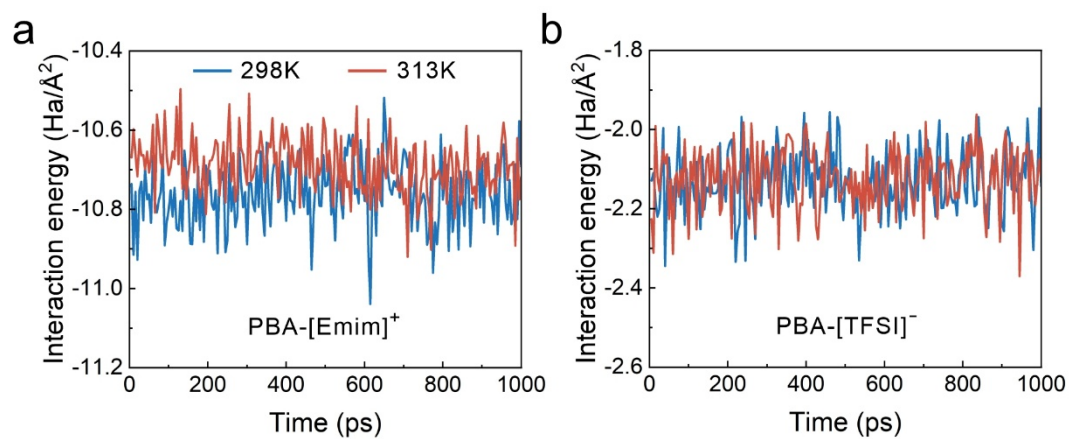

**Supplementary Figure 24. Interaction energy variations per unit area in the MD simulation system.** a) PBA-[Emim]<sup>+</sup> interaction energy and b) PBA-[TFSI]<sup>-</sup> interaction energy.

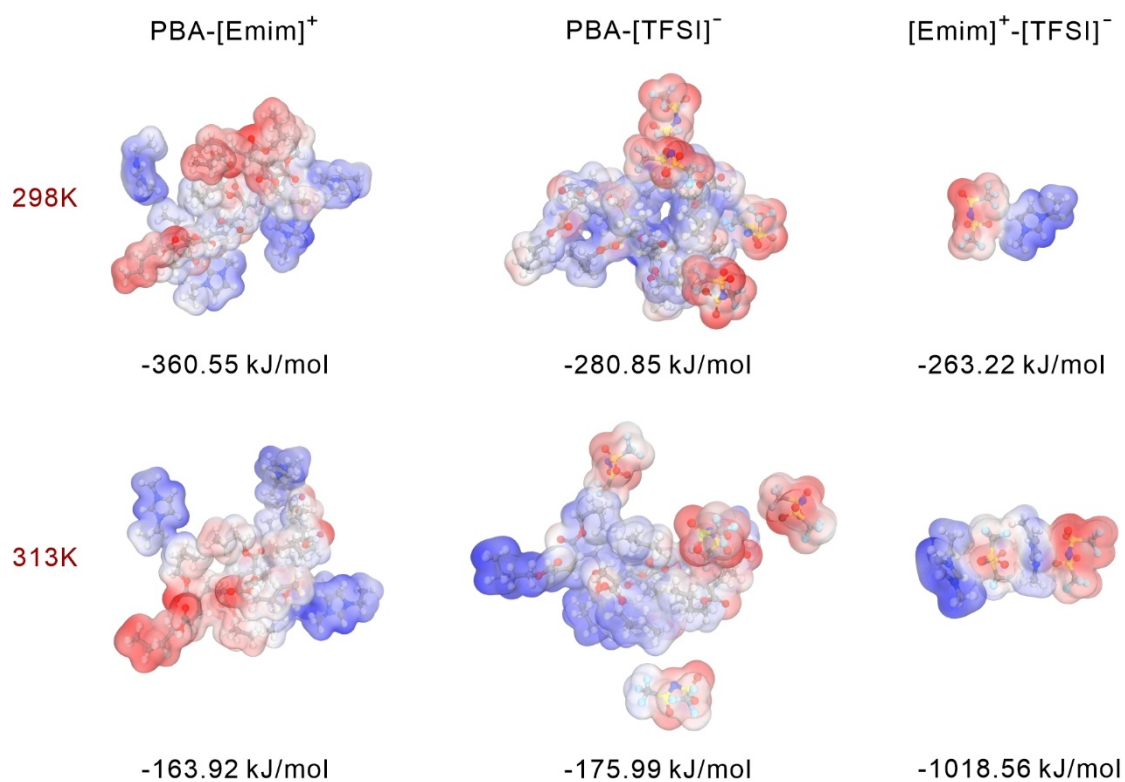

**Supplementary Figure 25. Optimized molecular configurations and ESP simulations of the three main interactions at different temperatures in MD simulations.**



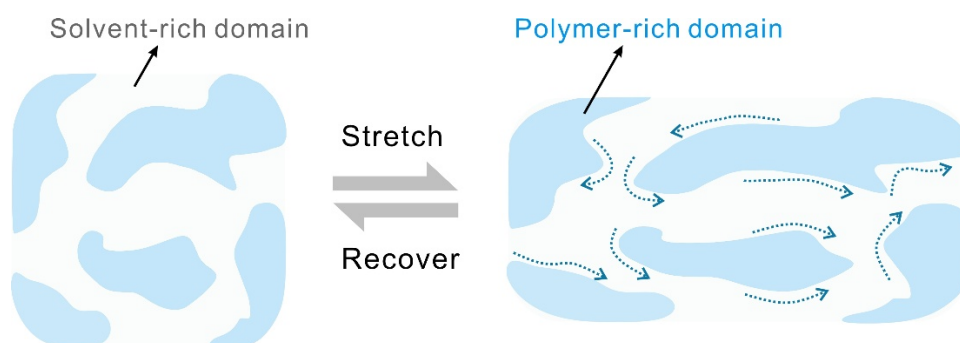

**Supplementary Figure 26. Schematic of interphase load-transfer and energy-dissipation pathway in a phase-separated structure.**

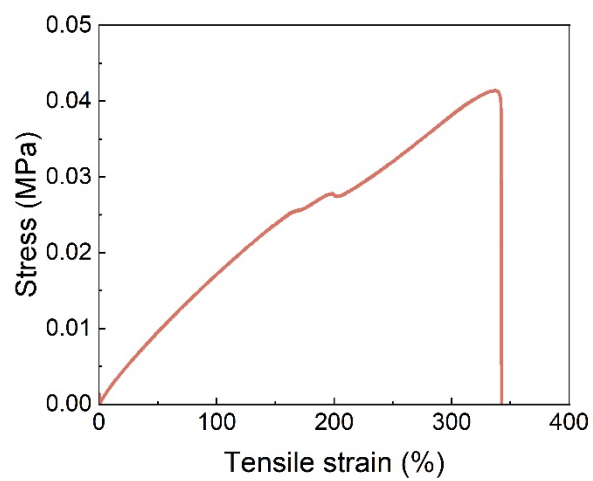

226

227 **Supplementary Figure 27. Stress-strain curves of pure PBA ionogel.**

228

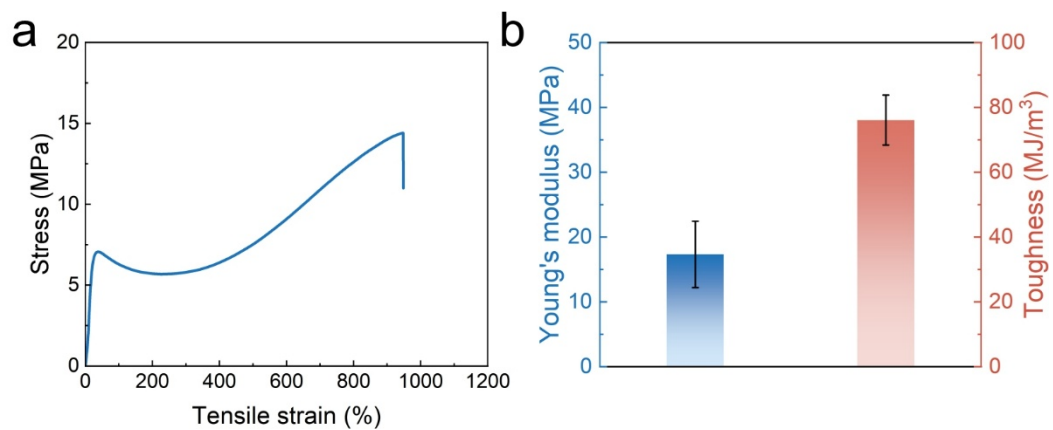

229

230 **Supplementary Figure 28. Mechanical properties of pure P(BA-co-NIPAM)**  
 231 **ionogel. a) Stress-strain curve. b) Young's modulus and toughness.**

232

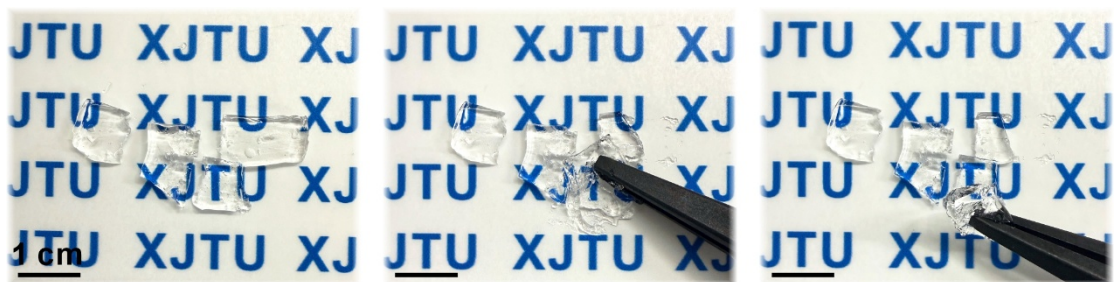

**Supplementary Figure 29. Demonstration of weak mechanical properties of PNIPAM hydrogels.**

ATI-B

$116 \pm 1^\circ$

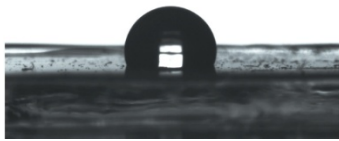

237

238 **Supplementary Figure 30. Water contact angle image of ATI-B.**

239

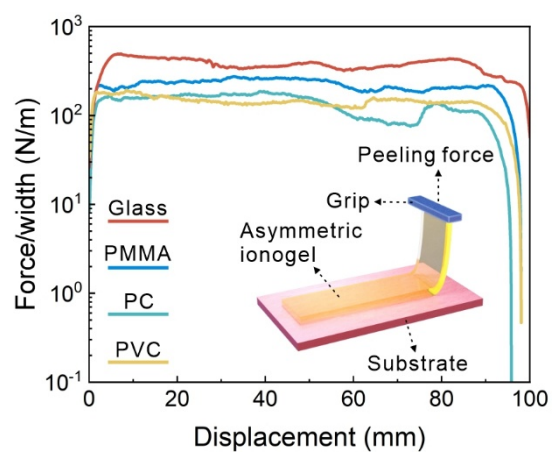

240

241 **Supplementary Figure 31. The 90° peel strength of ATI on different substrates,**  
 242 **with the insets showing the schematic of the testing method.**

243

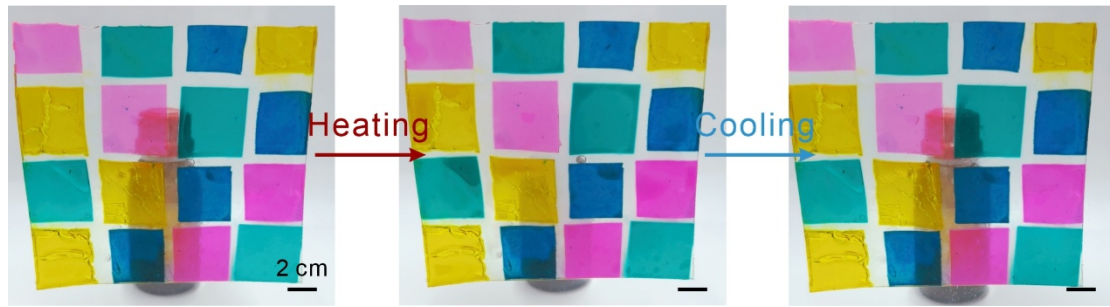

**Supplementary Figure 32. Demonstration of transparency change during heating-cooling process of ATI after modular staining.**

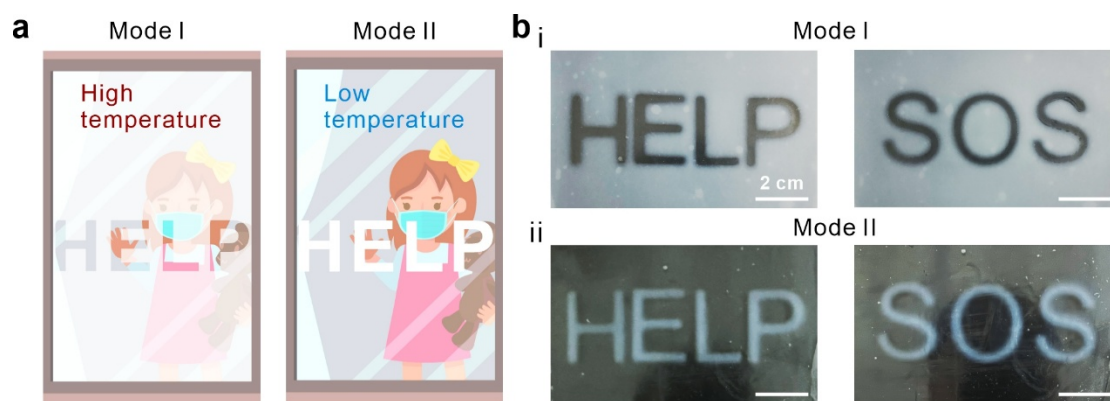

**Supplementary Figure 33. Schematic diagram of information display using ATI-based smart display windows.** a) Schematic for application in high and low temperature environments. b) Demonstration of application effects, including i) in high temperature environments (using cold objects as stamps) and ii) in low temperature environments (using hot objects as stamps).



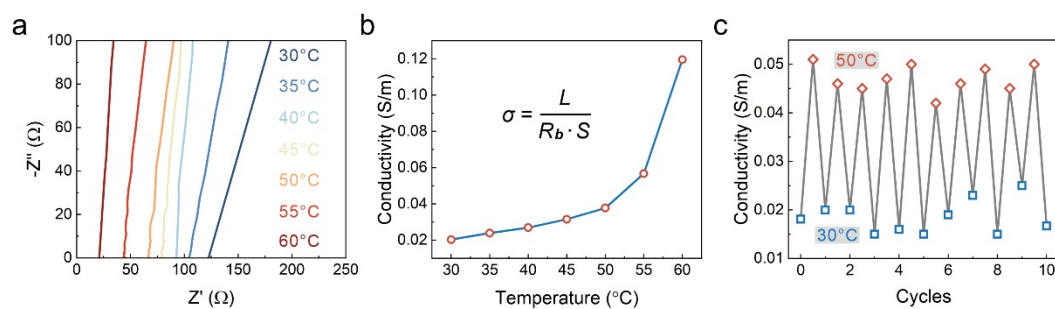

**Supplementary Figure 34. Electrical conductivity test results.** a) EIS curve. b) Curve of electrical conductivity versus temperature. c) Stability of electrical conductivity during heating-cooling cycles.

260 **Supplementary Table 1. Formulations of ATI-B with different LCSTs.**

| Group | Additions (Monomers in mmol) |              |              |              | LCST (°C) |
|-------|------------------------------|--------------|--------------|--------------|-----------|
|       | BA                           | [Emim][TFSI] | 1173         | EGDMA        |           |
| I     | 19.5                         | 6.4          | 0.05<br>mol% | 0.05<br>mol% | 28        |
| II    | 23.4                         | 5.1          |              |              | 34        |
| III   | 27.3                         | 3.8          |              |              | 38        |
| IV    | 31.2                         | 2.5          |              |              | 41        |

261

262 **Supplementary Table 2. Multiplication results of the signs of each cross-peak in**  
 263 **2DCOS synchronous and asynchronous spectra (Supplementary Figure 22) of the**  
 264 **ATI-B.**

|      |      |      |      |      |
|------|------|------|------|------|
| 1050 | —    | —    | —    |      |
| 1346 | —    | —    |      |      |
| 1180 | —    |      |      |      |
| 1650 |      |      |      |      |
|      | 1650 | 1180 | 1346 | 1050 |

265 According to Noda's rule, the final specific order for ATI-B during heating is given  
 266 as follows ( $\rightarrow$  means prior to or earlier than):  $\nu_{\text{as}}(-\text{N-S})$  ( $[\text{TFSI}]^-$ ,  $1050\text{ cm}^{-1}$ )  $\rightarrow$   $\nu_{\text{as}}(-$   
 267  $\text{S=O})$  ( $[\text{TFSI}]^-$ ,  $1180\text{ cm}^{-1}$ )  $\rightarrow$   $\nu_{\text{s}}(-\text{S=O})$  ( $[\text{TFSI}]^-$ ,  $1346\text{ cm}^{-1}$ )  $\rightarrow$   $\nu_{\text{as}}(-\text{C=N})$  (imidazole  
 268 ring of  $[\text{Emim}]^+$ ,  $1650\text{ cm}^{-1}$ ).  
 269

270 **Supplementary Table 3. Temperature-dependent  $T_{\text{sol}}$  and  $T_{\text{lum}}$  properties of ATL.**

| Temperature | $T_{\text{sol}}$ | $T_{\text{lum}}$ |
|-------------|------------------|------------------|
| 20°C        | 75.7%            | 86.4%            |
| 45°C        | 18.9%            | 8.1%             |
| $\Delta$    | 56.8%            | 78.3%            |

271

## Supplementary Note 1. FTIR analysis of ATIs.

With the introduction of PBA, the characteristic peaks in [Emim][TFSI] located at 1050 and 1347  $\text{cm}^{-1}$  attributed to -N-S antisymmetric telescoping vibration and -S=O antisymmetric telescoping vibration, respectively, move to 1055 and 1351  $\text{cm}^{-1}$ . Moreover, the characteristic peaks of -C-H symmetric stretching vibration and antisymmetric stretching vibration attributed to methyl group in PBA shift from 2873 and 2958  $\text{cm}^{-1}$  to 2875 and 2960  $\text{cm}^{-1}$ , respectively. All the blue shifts of the above characteristic peaks prove that strong ion-dipole interactions form between IL and the polymer (Fig. 2b)<sup>6</sup>. Similarly in ATI-BN, the formation of strong ion-dipole phase interactions is evidenced by the blue shifts of the characteristic peaks in the ionogel at 1058 and 1350  $\text{cm}^{-1}$  attributed to the -N-S antisymmetric telescoping vibration and the -S=O antisymmetric telescoping vibration, as compared to the solvent-free P(BA-co-NIPAM). It is noteworthy that the occurrence of the red shift of the -C=O characteristic peak at 1175  $\text{cm}^{-1}$  attributed to the ester group in the BA chain segment could be attributed to the increase in the bond length due to the steric effect in the phase-separated structure (Supplementary Fig. 8)<sup>7</sup>.

## Supplementary Note 2. Two-dimensional correlation spectroscopy (2DCOS).

Two-dimensional correlation spectroscopy (2DCOS) is an analytical technique originally proposed by Noda<sup>8, 9</sup>. It facilitates the interpretation of spectroscopic intensity variations induced by various external perturbations, including time, temperature, concentration, pressure, and electric field strength<sup>10, 11</sup>. By spreading spectral peaks over two dimensions, 2Dcos resolves spectral overlap and enhances spectral resolution.

A 2D correlation map is characterized by two independent wavenumber axes ( $\nu_1$ ,  $\nu_2$ ) and a correlation intensity axis. Analyses typically yield two types of spectra: synchronous and asynchronous. The correlation intensities in these maps reflect whether spectral changes occur in-phase (synchronous) or out-of-phase (asynchronous) relative to each other.

**Synchronous Spectrum:** This spectrum represents simultaneous or coincidental intensity changes at wavenumbers  $\nu_1$  and  $\nu_2$  in response to the external perturbation. The synchronous spectrum is symmetric across its diagonal. Peaks appearing on the diagonal are termed autopeaks. Their intensity is always positive, representing the autocorrelation magnitude of perturbation-induced molecular vibrations at each specific wavenumber. Significant autopeaks indicate regions where spectral intensity changes prominently under perturbation. Peaks appearing off the diagonal are termed cross-peaks. They can be either positive or negative. A positive cross-peak indicates that the intensity changes at  $\nu_1$  and  $\nu_2$  occur in the same direction (both increase or both decrease) during the perturbation. Conversely, a negative cross-peak signifies that the intensity changes at  $\nu_1$  and  $\nu_2$  occur in opposite directions (one increases while the other decreases).

**Asynchronous Spectrum:** This spectrum depicts sequential or temporally unsynchronized intensity changes at  $\nu_1$  and  $\nu_2$ . Unlike the synchronous spectrum, the asynchronous spectrum is asymmetric with respect to its diagonal and contains only off-diagonal cross-peaks, which can be positive or negative. Asynchronous cross-peaks develop exclusively when the dynamic intensity variations at  $\nu_1$  and  $\nu_2$  are out of phase

318 (e.g., one delayed or accelerated relative to the other). Crucially, these peaks appear  
319 only if  $\nu_1$  and  $\nu_2$  arise from different molecular sources or functional groups  
320 experiencing distinct effects due to the perturbation. Thus, asynchronous cross-peaks  
321 are particularly powerful for resolving overlapped bands originating from different  
322 chemical species, phases, or functional groups within dissimilar molecular  
323 environments.

324

### Supplementary Note 3. Entropy-driven dynamic phase separation in ATI-B.

Numerous studies report that hydrogen bonding and cation- $\pi$  interactions can induce ordered structures between ILs and polymers, thereby generating a negative mixing entropy ( $\Delta S_{\text{mix}}$ ). Similarly, we propose that oriented solvation driven by ion-dipole interactions in our system could serve as the driving force for the observed lower critical solution temperature (LCST) phase behavior. At room temperature, the Gibbs free energy of mixing ( $\Delta G_{\text{mix}} = \Delta H_{\text{mix}} - T\Delta S_{\text{mix}}$ ) is negative. However, heating endothermically disrupts these ion-dipole interactions, making  $\Delta H_{\text{mix}}$  less negative. Concurrently, the system gains entropy, increasing the magnitude of the entropic contribution ( $T|\Delta S_{\text{mix}}|$ ). When  $T|\Delta S_{\text{mix}}|$  exceeds  $|\Delta H_{\text{mix}}|$ ,  $\Delta G_{\text{mix}}$  becomes positive. This results in entropy-driven phase separation, where the ILs segregate into discrete domains.



**Supplementary Note 4. Calculation of transmittance and modulation capability.**

The  $T_{lum}$  and  $T_{sol}$  are calculated by the following equation<sup>12</sup>:

$$T_{lum,sol} = \frac{\int \varphi_{lum,sol}(\lambda)T(\lambda)d(\lambda)}{\int \varphi_{lum,sol}(\lambda)d(\lambda)} \quad (4)$$

where, the  $\varphi_{lum}$  is the luminous vision spectral photo efficiency of the human eye (380-780 nm),  $\varphi_{sol}$  is AM 1.5 standard solar irradiation spectrum (300-2500 nm),  $T(\lambda)$  is the spectral transmittance. Where  $\varphi_{lum}$  uses the CIE spectral luminous efficiency for photopic vision covering 380-780 nm and  $\varphi_{sol}$  uses the ASTM G173-03 standard spectrum covering 300-2500 nm.

The  $\Delta T_{lum}$  and  $\Delta T_{sol}$  are calculated by the following equation:

$$\Delta T_{lum,sol} = \Delta T_{lum,sol}(Transparent) - \Delta T_{lum,sol}(Opaque) \quad (5)$$

## References

- S1. Grimme S, Antony J, Ehrlich S, Krieg H. A consistent and accurate ab initio parametrization of density functional dispersion correction (DFT-D) for the 94 elements H-Pu. *The Journal of Chemical Physics* **132**, (2010).
- S2. Perdew JP, Ernzerhof M, Burke K. Rationale for mixing exact exchange with density functional approximations. *The Journal of Chemical Physics* **105**, 9982-9985 (1996).
- S3. Perdew JP, Burke K, Ernzerhof M. Generalized Gradient Approximation Made Simple. *Physical Review Letters* **77**, 3865-3868 (1996).
- S4. Zhang P, *et al.* Biomimetic Superhydrophobic Triboelectric Surface Prepared by Interfacial Self-Assembly for Water Harvesting. *Advanced Functional Materials* **35**, 2413201 (2025).
- S5. Dupré A, Dupré P. *Théorie mécanique de la chaleur*. Paris : Gauthier-Villars (1869).
- S6. Huang H, Sun L, Zhang Y, Zhang R, Chen C, Sun W. Ionogels Reinforced by Ionophobic Coordination. *Advanced Materials* **n/a**, 2506563.
- S7. Yin J, *et al.* Theoretical insights into CO<sub>2</sub>/N<sub>2</sub> selectivity of the porous ionic liquids constructed by ion-dipole interactions. *Journal of Molecular Liquids* **344**, 117676 (2021).
- S8. Noda I. Two-dimensional infrared spectroscopy. *Journal of the American Chemical Society* **111**, 8116-8118 (1989).
- S9. Noda I. Generalized Two-Dimensional Correlation Method Applicable to Infrared, Raman, and Other Types of Spectroscopy. *Appl Spectrosc* **47**, 1329-1336 (1993).
- S10. Sun S-t, Wu P-y. Spectral insights into microdynamics of thermoresponsive polymers from the perspective of two-dimensional correlation spectroscopy. *Chinese Journal of Polymer Science* **35**, 700-712 (2017).
- S11. Noda I. Recent advancement in the field of two-dimensional correlation

387 spectroscopy. *Journal of Molecular Structure* **883-884**, 2-26 (2008).  
388  
389 S12. Li B, Xu F, Guan T, Li Y, Sun J. Self-Adhesive Self-Healing Thermochromic  
390 Ionogels for Smart Windows with Excellent Environmental and Mechanical  
391 Stability, Solar Modulation, and Antifogging Capabilities. *Advanced Materials*  
392 **35**, 2211456 (2023).  
393  
394
